# Supplementary material for: Global analysis of the effect of local climate on the hatchling output of leatherback turtles
Source: PubMed Central journal article supplement (PMC4648107; doi:10.1038/srep16789), 2015-11-17

**Global analysis of the effect of local climate on the hatchling output of  
leatherback turtles**

Pilar Santidrián Tomillo<sup>1\*</sup>, Vincent S. Saba<sup>2</sup>, Claudia D. Lombard<sup>3</sup>, Jennifer M. Valiulis<sup>4</sup>,  
Nathan J. Robinson<sup>5</sup>, Frank V. Paladino<sup>5</sup>, James R. Spotila<sup>6</sup>, Carlos Fernández<sup>7</sup>, Marga L.  
Rivas<sup>8</sup>, Jenny Tucek<sup>9</sup>, Ronel Nel<sup>9</sup> & Daniel Oro<sup>1</sup>

<sup>1</sup>Population Ecology Group, Institut Mediterrani d' Estudis Avançats, IMEDEA (CSIC-UIB), Miquel Marquès, 21, 07190, Esporles, Mallorca, Spain.

<sup>2</sup>National Oceanic and Atmospheric Administration, National Marine Fisheries Service, Northeast Fisheries Science Center, c/o Geophysical Fluid Dynamics Laboratory, 201 Forrestal Road, Princeton University Forrestal Campus, Princeton, New Jersey, USA;

<sup>3</sup>U.S. Fishing and Wildlife Service, USA

<sup>4</sup>Geographic Consulting, St. Croix, U.S. Virgin Islands, USA.

<sup>5</sup>Department of Biology, Indiana-Purdue University, Fort Wayne, Indiana, USA.

<sup>6</sup>Department of Biodiversity, Earth and Environmental Science, Drexel University, Philadelphia, Pennsylvania, USA.

<sup>7</sup>Endangered Wildlife Trust, Avda. 11, San José, Costa Rica.

<sup>8</sup>Universidad de Granada, Campus Fuentenueva s/n, Granada, Spain.

<sup>9</sup>Department of Zoology, Nelson Mandela Metropolitan University, Port Elizabeth, South Africa.

**Table S1** | Generalized Additive Model (GAM) results on the effect of local climate on hatching success of leatherback turtle clutches. Predictors were air temperature (Temp), average rain accumulated during incubation ( $\text{Rain}_{\text{ave}}$ ), total rain accumulated during incubation ( $\text{Rain}_{\text{acc}(0,1)}$ ), rain accumulated during the month eggs were laid ( $\text{Rain}_{\text{acc}(0)}$ ), rain accumulated during the month eggs were laid and previous month ( $\text{Rain}_{\text{acc}(0,-1)}$ ), rain accumulated during the month eggs were laid and two previous months ( $\text{Rain}_{\text{acc}(0,-1,-2)}$ ) and rain accumulated during two months before eggs were laid ( $\text{Rain}_{\text{acc}(-1,-2)}$ ). Best models (lowest AICc) are marked in bold and significant effect from predictor with (\*). Only sites for which there were significant effects of local climate are included.

| <b>Model (smooth terms)</b>          | <b>Site</b> | <b>df</b>   | <b>AIC</b>    | <b>AICc</b>   | <b>Deviance explained (%)</b> | <b>R<sup>2</sup> adjusted</b> |
|--------------------------------------|-------------|-------------|---------------|---------------|-------------------------------|-------------------------------|
| <b>Temp+Rain*<sub>ave(0,1)</sub></b> | <b>All</b>  | <b>11.4</b> | <b>-231.0</b> | <b>-229.1</b> | <b>33.8</b>                   | <b>0.296</b>                  |
| <b>Temp+Rain*<sub>acc(0,1)</sub></b> | <b>All</b>  | <b>11.4</b> | <b>-231.0</b> | <b>-229.1</b> | <b>33.8</b>                   | <b>0.296</b>                  |
| Temp+Rain* <sub>acc(0)</sub>         | All         | 10.8        | -209.9        | -208.2        | 23.9                          | 0.195                         |
| Temp+Rain* <sub>acc(0,-1)</sub>      | All         | 11.7        | -210.3        | -208.4        | 25.0                          | 0.201                         |
| Temp+Rain* <sub>acc(0,-1,-2)</sub>   | All         | 8.7         | -190.8        | -189.7        | 12.0                          | 0.082                         |
| Temp+Rain <sub>acc(-1,-2)</sub>      | All         | 8.7         | -187.6        | -186.5        | 10.3                          | 0.064                         |
| Temp                                 | All         | 3.9         | -185.3        | -185.0        | 3.5                           | 0.023                         |
| Rain* <sub>ave</sub>                 | All         | 10.0        | -228.5        | -227.0        | 31.5                          | 0.279                         |
| Rain* <sub>acc(0,1)</sub>            | All         | 10.0        | -228.5        | -227.0        | 31.5                          | 0.279                         |
| Rain* <sub>acc(0)</sub>              | All         | 9.0         | -207.9        | -206.7        | 21.3                          | 0.176                         |
| Rain* <sub>acc(0,-1)</sub>           | All         | 9.9         | -209.0        | -207.6        | 22.7                          | 0.187                         |
| Rain <sub>acc(0,-1,-2)</sub>         | All         | 7.2         | -189.4        | -188.6        | 9.7                           | 0.067                         |

|                                          |                |            |               |               |             |              |
|------------------------------------------|----------------|------------|---------------|---------------|-------------|--------------|
| Rain <sub>acc(-1,-2)</sub>               | All            | 7.1        | -186.0        | -185.3        | 7.6         | 0.046        |
| Temp+Rain* <sub>ave(0,1)</sub>           | S Point        | 6.4        | -157.1        | -155.9        | 12.7        | 0.081        |
| Temp+Rain* <sub>acc(0,1)</sub>           | S Point        | 6.4        | -157.1        | -155.9        | 12.7        | 0.081        |
| Temp+Rain* <sub>acc(0)</sub>             | S Point        | 6.7        | -155.8        | -154.5        | 11.9        | 0.071        |
| Temp+Rain* <sub>acc(0,-1)</sub>          | S Point        | 7.3        | -160.5        | -159.0        | 17.6        | 0.124        |
| <b>Temp+Rain*<sub>acc(0,-1,-2)</sub></b> | <b>S Point</b> | <b>8.2</b> | <b>-165.4</b> | <b>-163.5</b> | <b>23.6</b> | <b>0.178</b> |
| Temp+Rain* <sub>acc(-1,-2)</sub>         | S Point        | 8.5        | -158.5        | -156.5        | 18          | 0.115        |
| Temp                                     | S Point        | 3.0        | -152.3        | -152.1        | 0.75        | -0.003       |
| Rain* <sub>ave</sub>                     | S Point        | 3.0        | -158.5        | -158.2        | 7.29        | 0.006        |
| Rain* <sub>acc(0,1)</sub>                | S Point        | 3.0        | -158.5        | -158.2        | 7.29        | 0.006        |
| Rain* <sub>acc(0)</sub>                  | S Point        | 3.0        | -157.0        | -156.7        | 5.71        | 0.046        |
| Rain* <sub>acc(0,-1)</sub>               | S Point        | 3.0        | -158.9        | -158.6        | 7.73        | 0.067        |
| Rain* <sub>acc(0,-1,-2)</sub>            | S Point        | 3.4        | -161.8        | -161.5        | 11.6        | 0.101        |
| Rain <sub>acc(-1,-2)</sub>               | S Point        | 3.7        | -156.6        | -156.2        | 6.78        | 0.050        |
| Temp+Rain <sub>ave(0,1)</sub>            | P Grande       | 7.2        | -44.7         | -40.5         | 47.4        | 0.383        |
| Temp+Rain <sub>acc(0,1)</sub>            | P Grande       | 7.2        | -44.7         | -40.5         | 47.4        | 0.383        |
| Temp+Rain <sub>acc(0)</sub>              | P Grande       | 7.8        | -44.0         | -39.0         | 48.2        | 0.379        |
| Temp+Rain* <sub>acc(0,-1)</sub>          | P Grande       | 5.4        | -48.9         | -46.5         | 48.5        | 0.429        |
| Temp+Rain* <sub>acc(0,-1,-2)</sub>       | P Grande       | 5.4        | -60.4         | -58           | 62.4        | 0.584        |
| Temp+Rain* <sub>acc(-1,-2)</sub>         | P Grande       | 5.4        | -63.3         | -61.1         | 65.3        | 0.617        |
| Temp*                                    | P Grande       | 4.8        | -43.1         | -41.2         | 37.1        | 0.317        |
| Rain* <sub>ave</sub>                     | P Grande       | 5.6        | -40.5         | -38.0         | 35.6        | 0.282        |
| Rain* <sub>acc(0,1)</sub>                | P Grande       | 5.6        | -40.5         | -38.0         | 35.6        | 0.282        |

|                                   |                 |            |              |              |             |              |
|-----------------------------------|-----------------|------------|--------------|--------------|-------------|--------------|
| Rain* <sub>acc(0)</sub>           | P Grande        | 6.9        | -41.7        | -37.8        | 41.7        | 0.324        |
| Rain* <sub>acc(0,-1)</sub>        | P Grande        | 3.9        | -46.7        | -45.5        | 40.2        | 0.368        |
| Rain* <sub>acc(0,-1,-2)</sub>     | P Grande        | 3.9        | -61.2        | -60.0        | 60          | 0.578        |
| <b>Rain*<sub>acc(-1,-2)</sub></b> | <b>P Grande</b> | <b>3.5</b> | <b>-63.5</b> | <b>-62.5</b> | <b>61.8</b> | <b>0.60</b>  |
| Temp+Rain <sub>ave(0,1)</sub>     | Pacuare         | 4.0        | -40.5        | -38.7        | 6.76        | -0.01        |
| Temp+Rain <sub>acc(0,1)</sub>     | Pacuare         | 4.0        | -40.5        | -38.7        | 6.76        | -0.01        |
| Temp+Rain <sub>acc(0)</sub>       | Pacuare         | 4.0        | -40.5        | -38.7        | 6.7         | -0.01        |
| Temp+Rain <sub>acc(0,-1)</sub>    | Pacuare         | 6.5        | -44.8        | -39.7        | 34          | 0.201        |
| Temp+Rain <sub>acc(0,-1,-2)</sub> | Pacuare         | 7.0        | -41.4        | -35.5        | 27.9        | 0.107        |
| Temp+Rain <sub>acc(-1,-2)</sub>   | Pacuare         | 8.6        | -44.0        | -34.4        | 42          | 0.221        |
| Temp                              | Pacuare         | 3.0        | -42.3        | -41.2        | 5.88        | 0.021        |
| Rain <sub>ave</sub>               | Pacuare         | 3.0        | -41.3        | -40.3        | 2.65        | -0.012       |
| Rain <sub>acc(0,1)</sub>          | Pacuare         | 3.0        | -41.3        | -40.3        | 2.65        | -0.012       |
| Rain <sub>acc(0)</sub>            | Pacuare         | 3.0        | -41.2        | -40.1        | 2.07        | -0.018       |
| <b>Rain<sub>acc(0,-1)</sub></b>   | <b>Pacuare</b>  | <b>5.5</b> | <b>-45.8</b> | <b>-42.3</b> | <b>31.6</b> | <b>0.209</b> |
| Rain <sub>acc(0,-1,-2)</sub>      | Pacuare         | 7.0        | -43.7        | -37.8        | 33.7        | 0.179        |
| Rain* <sub>acc(-1,-2)</sub>       | Pacuare         | 10.2       | -54.2        | -39.7        | 64.6        | 0.483        |

**Table S2** | Generalized Additive Model (GAM) results on the effect of local climate on emergence rate of leatherback turtle clutches. Predictors were air temperature (Temp), average rain accumulated during incubation ( $\text{Rain}_{\text{ave}}$ ), total rain accumulated during incubation ( $\text{Rain}_{\text{acc}(0,1)}$ ), rain accumulated during the month eggs were laid ( $\text{Rain}_{\text{acc}(0)}$ ), rain accumulated during the month eggs were laid and previous month ( $\text{Rain}_{\text{acc}(0,-1)}$ ), rain accumulated during the month eggs were laid and two previous months ( $\text{Rain}_{\text{acc}(0,-1,-2)}$ ) and rain accumulated during two months before eggs were laid ( $\text{Rain}_{\text{acc}(-1,-2)}$ ). Best models (lowest AICc) are marked in bold and effect from significant predictor with (\*). Only sites for which there were significant effects of local climate are included.

| <b>Model (smooth terms)</b>       | <b>Site</b> | <b>df</b>   | <b>AIC</b>    | <b>AICc</b>   | <b>Deviance</b>      | <b>R<sup>2</sup></b> |
|-----------------------------------|-------------|-------------|---------------|---------------|----------------------|----------------------|
|                                   |             |             |               |               | <b>explained (%)</b> | <b>adjusted</b>      |
| Temp+Rain* <sub>ave(0,1)</sub>    | All         | 11.0        | -428.2        | -426.4        | 36.1                 | 0.323                |
| Temp+Rain* <sub>acc(0,1)</sub>    | All         | 11.0        | -428.2        | -426.4        | 36.1                 | 0.323                |
| Temp+Rain* <sub>acc(0)</sub>      | All         | 11.3        | -402.8        | -401.0        | 25.5                 | 0.209                |
| Temp+Rain* <sub>acc(0,-1)</sub>   | All         | 12.1        | -406.9        | -404.7        | 28.1                 | 0.233                |
| Temp+Rain <sub>acc(0,-1,-2)</sub> | All         | 6.5         | -374.4        | -373.7        | 5.68                 | 0.029                |
| Temp+Rain* <sub>acc(-1,-2)</sub>  | All         | 10.9        | -384.2        | -382.4        | 16                   | 0.110                |
| Temp                              | All         | 4.0         | -375.3        | -375.1        | 3.24                 | 0.020                |
| <b>Rain*<sub>ave</sub></b>        | <b>All</b>  | <b>10.0</b> | <b>-430.1</b> | <b>-428.7</b> | <b>36.1</b>          | <b>0.327</b>         |
| <b>Rain*<sub>acc(0,1)</sub></b>   | <b>All</b>  | <b>10.0</b> | <b>-430.1</b> | <b>-428.6</b> | <b>36.1</b>          | <b>0.327</b>         |
| Rain* <sub>acc(0)</sub>           | All         | 9.5         | -402.6        | -401.3        | 23.7                 | 0.20                 |
| Rain* <sub>acc(0,-1)</sub>        | All         | 10.3        | -407.1        | -405.5        | 26.6                 | 0.225                |

|                                     |                |            |               |               |            |              |
|-------------------------------------|----------------|------------|---------------|---------------|------------|--------------|
| Rain <sub>acc(0,-1,-2)</sub>        | All            | 6.0        | -375.4        | -374.9        | 5.64       | 0.032        |
| Rain* <sub>acc(-1,-2)</sub>         | All            | 9.1        | -385.2        | -384.0        | 14.6       | 0.106        |
| Temp+Rain <sub>ave(0,1)</sub>       | S Point        | 4.0        | -383.5        | -383.0        | 1.67       | -0.005       |
| Temp+Rain <sub>acc(0,1)</sub>       | S Point        | 4.0        | -383.5        | -383.0        | 1.67       | -0.005       |
| Temp+Rain <sub>acc(0)</sub>         | S Point        | 4.0        | -382.9        | -382.4        | 0.95       | -0.013       |
| Temp+Rain* <sub>acc(0,-1)</sub>     | S Point        | 7.9        | -385.5        | -383.8        | 11.9       | 0.056        |
| Temp+Rain* <sub>acc(0,-1,-2)</sub>  | S Point        | 7.6        | -387.7        | -386.1        | 13.3       | 0.075        |
| Temp+Rain* <sub>acc(-1,-2)</sub>    | S Point        | 4.2        | -389.5        | -389.0        | 8.46       | 0.061        |
| Temp                                | S Point        | 3.0        | -384.3        | -384.0        | 0.31       | -0.008       |
| Rain <sub>ave</sub>                 | S Point        | 3.0        | -385.3        | -385.0        | 1.46       | 0.003        |
| Rain <sub>acc(0,1)</sub>            | S Point        | 3.0        | -385.3        | -385.0        | 1.46       | 0.003        |
| Rain <sub>acc(0)</sub>              | S Point        | 3.0        | -384.6        | -384.3        | 0.69       | -0.004       |
| Rain* <sub>acc(0,-1)</sub>          | S Point        | 3.0        | -388.5        | -388.2        | 4.84       | 0.038        |
| Rain* <sub>acc(0,-1,-2)</sub>       | S Point        | 3.0        | -390.8        | -390.5        | 7.26       | 0.062        |
| <b>Rain*<sub>acc(-1,-2)</sub></b>   | <b>S Point</b> | <b>3.2</b> | <b>-391.5</b> | <b>-391.2</b> | <b>8.4</b> | <b>0.072</b> |
| Temp+Rain* <sub>ave(0,1)</sub>      | P Grande       | 8.4        | -80.5         | -74.6         | 55.7       | 0.458        |
| Temp+Rain* <sub>acc(0,1)</sub>      | P Grande       | 8.4        | -80.5         | -74.6         | 55.7       | 0.458        |
| Temp+Rain* <sub>acc(0)</sub>        | P Grande       | 7.7        | -81.4         | -76.6         | 55         | 0.463        |
| Temp+Rain* <sub>acc(0,-1)</sub>     | P Grande       | 6.0        | -84.5         | -81.6         | 54.7       | 0.489        |
| Temp*+Rain* <sub>acc(0,-1,-2)</sub> | P Grande       | 12.7       | -96.5         | -80.7         | 77.7       | 0.678        |
| Temp+Rain* <sub>acc(-1,-2)</sub>    | P Grande       | 8.7        | -84.6         | -78.2         | 61         | 0.518        |
| Temp*                               | P Grande       | 5.5        | -73.6         | -71.2         | 36.9       | 0.30         |
| Rain* <sub>ave</sub>                | P Grande       | 4.9        | -77.4         | -75.5         | 41.4       | 0.361        |

|                                     |                 |            |              |              |             |              |
|-------------------------------------|-----------------|------------|--------------|--------------|-------------|--------------|
| Rain* <sub>acc(0,1)</sub>           | P Grande        | 4.9        | -77.4        | -75.5        | 41.4        | 0.361        |
| Rain* <sub>acc(0)</sub>             | P Grande        | 4.8        | -78.1        | -76.3        | 42.1        | 0.371        |
| Rain* <sub>acc(0,-1)</sub>          | P Grande        | 4.5        | -85.6        | -84.0        | 52.2        | 0.485        |
| <b>Rain*<sub>acc(0,-1,-2)</sub></b> | <b>P Grande</b> | <b>4.2</b> | <b>-89.0</b> | <b>-87.5</b> | <b>55.8</b> | <b>0.528</b> |
| Rain* <sub>acc(-1,-2)</sub>         | P Grande        | 3.8        | -79.9        | -78.7        | 42          | 0.387        |
| Temp+Rain <sub>ave(0,1)</sub>       | Pacuare         | 4.0        | -46.0        | -44.2        | 0.8         | -0.075       |
| Temp+Rain <sub>acc(0,1)</sub>       | Pacuare         | 4.0        | -46.0        | -44.2        | 0.8         | -0.075       |
| Temp+Rain <sub>acc(0)</sub>         | Pacuare         | 4.0        | -45.9        | -44.1        | 0.2         | -0.082       |
| Temp+Rain <sub>acc(0,-1)</sub>      | Pacuare         | 7.3        | -53.7        | -47.3        | 41.3        | 0.264        |
| Temp+Rain <sub>acc(0,-1,-2)</sub>   | Pacuare         | 9.6        | -48.0        | -35.7        | 38.9        | 0.138        |
| Temp+Rain* <sub>acc(-1,-2)</sub>    | Pacuare         | 10.8       | -61.7        | -44.8        | 66.5        | 0.492        |
| Temp                                | Pacuare         | 3.0        | -47.8        | -46.8        | 0.0         | -0.039       |
| Rain <sub>ave</sub>                 | Pacuare         | 3.0        | -48.0        | -47.0        | 0.7         | -0.032       |
| Rain <sub>acc(0,1)</sub>            | Pacuare         | 3.0        | -48.0        | -47.0        | 0.7         | -0.032       |
| Rain <sub>acc(0)</sub>              | Pacuare         | 3.0        | -47.9        | -46.8        | 0.1         | -0.039       |
| <b>Rain<sub>acc(0,-1)</sub></b>     | <b>Pacuare</b>  | <b>6.2</b> | <b>-55.2</b> | <b>-50.7</b> | <b>40.0</b> | <b>0.284</b> |
| Rain <sub>acc(0,-1,-2)</sub>        | Pacuare         | 3.0        | -48.1        | -47.0        | 0.9         | -0.031       |
| Rain* <sub>acc(-1,-2)</sub>         | Pacuare         | 9.9        | -62.7        | -49.4        | 65.3        | 0.503        |

**Figure S1 | Effect of precipitation on the hatchling output.** Values represent mean monthly hatching success and emergence rate. Best predictors on hatching success were precipitation accumulated during **(a)** the month eggs were laid and the two previous months at Sandy Point, **(b)** the month eggs were laid and the month before at Pacuare and **(c)** the two months before eggs were laid at Playa Grande ( $R^2$  adjusted in GAMs = 0.178, 0.209 and 0.60 for Sandy Point, Pacuare and Playa Grande respectively, table S1). Emergence rate predictors were precipitation accumulated **(d)** two months before eggs were laid at Sandy Point, **(e)** during the month eggs were laid and the month before at Pacuare and **(f)** in the month eggs were laid and two months before at Playa Grande ( $R^2$  adjusted in GAMs = 0.072, 0.284 and 0.528 for Sandy Point, Pacuare and Playa Grande respectively, table S2).



**Fig. S1.**

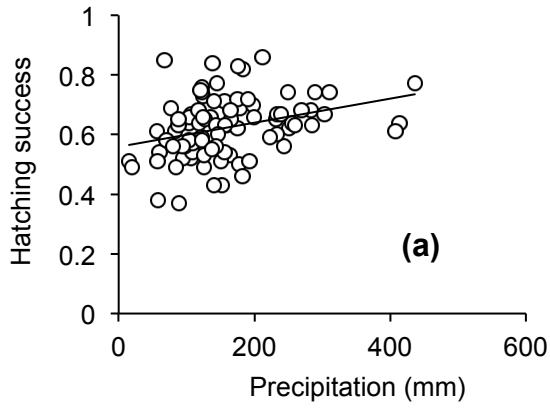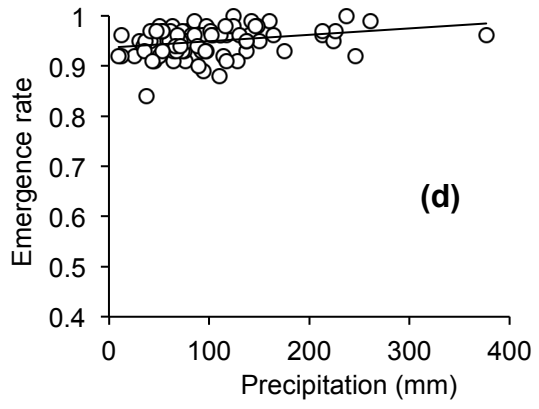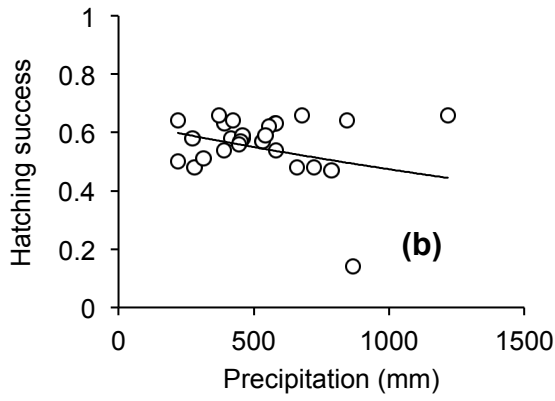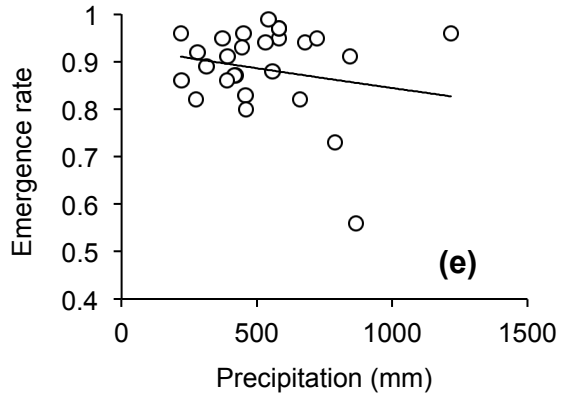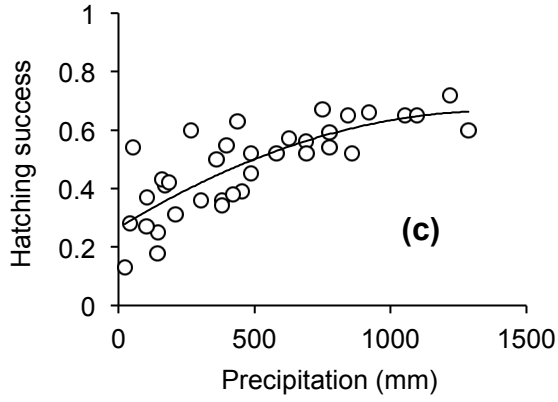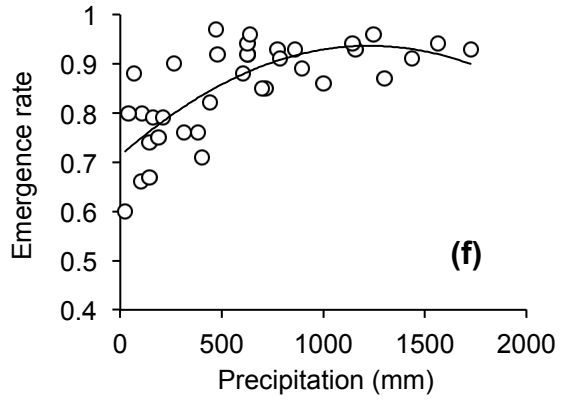

Supplement: srep16789-s1.pdf [file srep16789-s1.pdf]
